# Supplementary material for: Quantitative analyses for effects of neddylation on CRL2VHL substrate ubiquitination and degradation
Source: PubMed Central journal article supplement — Protein Sci. 2021 Sep 13;30(11):2338–45. doi: 10.1002/pro.4176 (PMC8521307; doi:10.1002/pro.4176), 2021-09-13
Supplement: PRO-30-2338-s001.pdf [file PRO-30-2338-s001.pdf]

## Supplementary Material

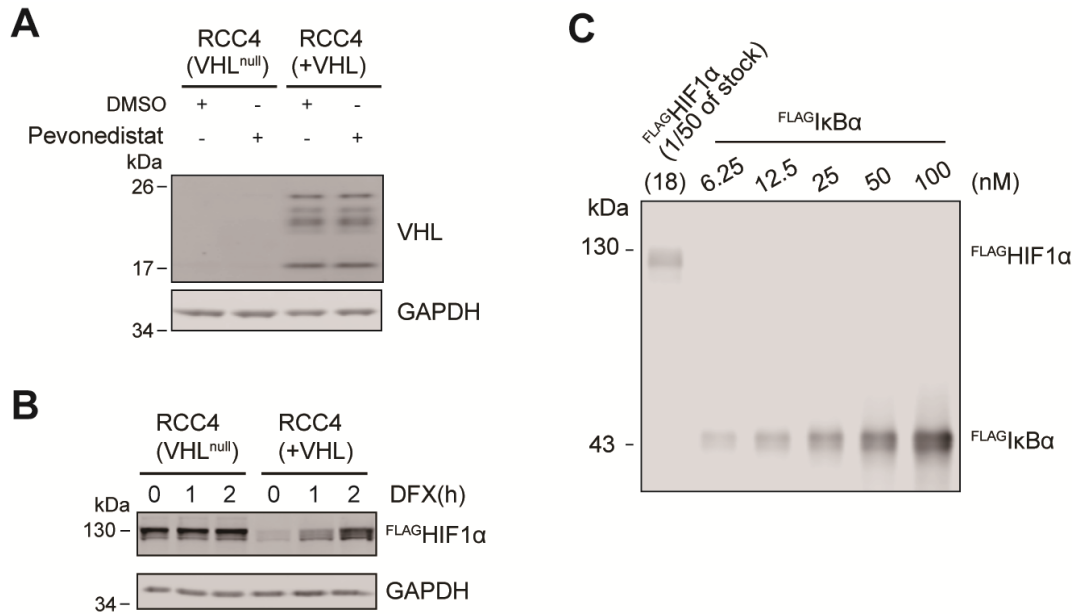

**Figure S1. Expression and purification of  $^{FLAG}HIF1\alpha$  in RCC4 cells.** (A) RCC4 (VHL null) and RCC4 (+VHL) cells were treated with DMSO or pevonedistat for 2 h and analyzed by WB with VHL and GAPDH antibodies. (B) The indicated RCC4 cells were infected with lentiviruses expressing  $^{FLAG}HIF1\alpha$ , treated with DFX for the indicated time periods, and lysed in 2×SDS sample buffer for WB analyses with FLAG and GAPDH antibodies. (C) Concentration of  $^{FLAG}HIF1\alpha$  protein stock purified from RCC4 cells was quantified for the *in vitro* ubiquitination assay.  $^{FLAG}HIF1\alpha$  was immunoprecipitated from RCC4 (VHL null) cells as shown in (B), eluted with 3×FLAG peptide, concentrated and aliquoted. Recombinant  $^{FLAG}I\kappa B\alpha$  with a known concentration was serially diluted and analyzed by WB together with purified  $^{FLAG}HIF1\alpha$ . The concentration of diluted  $^{FLAG}HIF1\alpha$  stock were determined by fitting the intensity of the  $^{FLAG}HIF1\alpha$  band to the standard curve of  $^{FLAG}I\kappa B\alpha$ . Number in brackets is the calculated value.

## Supplementary Material

530

EFKLELVEKLF AEDTEAKNPFSTQDTDL DLEMLAPYIPMDDDFQLRSFDQ

580

LSPLESSSASPESASPQSTVTVFQQTQIQEPTANATTTTATTDELKTVTK

630

652

DRMEDIKILIASPSPTHIHKETT

**Figure S2. Amino acid sequence of CODD.** Related to Figure 3C-F.
